# Supplementary material
Source: publisher site journal article supplement (https://www.dovepress.com/get_supplementary_file.php?f=476241.docx)
Supplement: Supplementary file 1 [file get_supplementary_file.php]

**Supplementary material**

**Supplementary table 1:**

| NP | | Shared | | NP-HSA | |
| --- | --- | --- | --- | --- | --- |
| Q9BQI0-3 | AIF1L | P60709 | ACTB | Q96P26-2 | 5NT1B |
| Q9NZN9-2 | AIPL1 | P02768 | ALBU | P02763 | A1AG1 |
| P08519 | APOA | P02647 | APOA1 | P04217-2 | A1BG |
| P02654 | APOC1 | P02652 | APOA2 | P01023 | A2MG |
| P54707-2 | AT12A | P02655 | APOC2 | Q8NHS2 | AATC2 |
| Q96L58 | B3GT6 | P02656 | APOC3 | Q8IUA7-3 | ABCA9 |
| Q9C0J9 | BHE41 | P02649 | APOE | Q9H221-2 | ABCG8 |
| O75419-2 | CDC45 | P46100-2 | ATRX | Q09666 | AHNK |
| O15078 | CE290 | P10909-2 | CLUS | Q9BQI0-2 | AIF1L |
| P52757-9 | CHIO | P55265-2 | DSRAD | Q8NAG6-1 | ANKL1 |
| Q9UBY8 | CLN8 | Q63HQ2-2 | EGFLA | Q8TER5-2 | ARH40 |
| O76031 | CLPX | Q5W0V3-2 | F16B1 | Q6ZSZ5-2 | ARHGI |
| Q9Y6Y1-2 | CMTA1 | P02675 | FIBB | Q8N3C0 | ASCC3 |
| P02748 | CO9 | Q7Z2K8-2 | GRIN1 | Q6ZP68 | ATPUN |
| Q969M2 | CXA10 | P00738-2 | HPT | P04003 | C4BPA |
| Q96JB1-2 | DYH8 | Q8IZT8 | HS3S5 | P01024 | CO3 |
| A0FGR8-2 | ESYT2 | P0DOX6 | IGM | P0C0L4-2 | CO4A |
| Q5T1M5-2 | FKB15 | Q14624-2 | ITIH4 | Q03001 | DYST |
| Q9NP62 | GCM1 | Q9P260-2 | K1468 | Q9UBC2-2 | EP15R |
| Q12906-7 | ILF3 | P13645 | K1C10 | Q8TBR7-1 | FA57A |
| A1L0T0 | ILVBL | P35527 | K1C9 | P07148 | FABPL |
| A6NCM1 | IQCAL | P04264 | K2C1 | P02671 | FIBA |
| Q9NVX7-2 | KBTB4 | O95096 | NKX22 | Q9P2B2 | FPRP |
| Q9H0B6 | KLC2 | Q7Z5J4-2 | RAI1 | Q8NA03 | FSIP1 |
| Q9H0U3-2 | MAGT1 | P0DJI9 | SAA2 | Q16695 | H31T |
| Q685J3-2 | MUC17 | Q8TF72 | SHRM3 | P69905 | HBA |
| Q9H094-2 | NBPF3 | P46977-2 | STT3A | P68871 | HBB |
| Q96IV0-2 | NGLY1 | Q9BZF9-2 | UACA | Q9Y450-4 | HBS1L |
| P14543-2 | NID1 | Q99536-2 | VAT1 | P02790 | HEMO |
| P54368 | OAZ1 | P49750-3 | YLPM1 | O15347 | HMGB3 |
| Q9Y5G0-2 | PCDGH | P31629 | ZEP2 | P0DOX5 | IGG1 |
| Q9Y6V0-5 | PCLO |  |  | P01876 | IGHA1 |
| Q9H875-2 | PKRI1 |  |  | P01859 | IGHG2 |
| Q9UNP9-2 | PPIE |  |  | P0DOY2 | IGLC2 |
| Q8IYL9 | PSYR |  |  | P40189-3 | IL6RB |
| Q9H1J1-2 | REN3A |  |  | P52292 | IMA1 |
| Q96FB5 | RRNAD |  |  | P19823 | ITIH2 |
| Q7L099-4 | RUFY3 |  |  | P13647 | K2C5 |
| Q96NL0-4 | RUN3B |  |  | Q4VXA5 | KHDC1 |
| P49589-2 | SYCC |  |  | Q2M1P5 | KIF7 |
| Q9UL54-2 | TAOK2 |  |  | A6PVL3-2 | KNCN |
| Q8WUA7-3 | TB22A |  |  | P01042-2 | KNG1 |
| O94876 | TMCC1 |  |  | Q8N2S1-4 | LTBP4 |
| O75865-2 | TPC6A |  |  | Q9Y6D9 | MD1L1 |
| Q6P9F5-2 | TRI40 |  |  | O15440-5 | MRP5 |
| Q9P2H5-2 | UBP35 |  |  | P16333 | NCK1 |
| A4UGR9-4 | XIRP2 |  |  | Q969V3-2 | NCLN |
| Q9H7S9 | ZN703 |  |  | Q9BTX1-4 | NDC1 |
|  |  |  |  | Q86VF7-2 | NRAP |
|  |  |  |  | Q9UBU9-2 | NXF1 |
|  |  |  |  | Q6ZVC0-2 | NYAP1 |
|  |  |  |  | Q9Y3B8 | ORN |
|  |  |  |  | Q58A45-2 | PAN3 |
|  |  |  |  | P00747 | PLMN |
|  |  |  |  | Q01860-2 | PO5F1 |
|  |  |  |  | O75400-2 | PR40A |
|  |  |  |  | Q05209-2 | PTN12 |
|  |  |  |  | Q8NC74 | RB8NL |
|  |  |  |  | Q7Z4M0 | RE114 |
|  |  |  |  | Q9BZE1 | RM37 |
|  |  |  |  | Q4U2R6 | RM51 |
|  |  |  |  | P35542 | SAA4 |
|  |  |  |  | Q8IYX7 | SAXO1 |
|  |  |  |  | Q9NQW1-5 | SC31B |
|  |  |  |  | Q96FS4 | SIPA1 |
|  |  |  |  | Q8WWL2-2 | SPIR2 |
|  |  |  |  | Q9UQ35-2 | SRRM2 |
|  |  |  |  | Q7RTT3 | SSX9 |
|  |  |  |  | Q9NRC1-2 | ST7 |
|  |  |  |  | Q9BXT5 | TEX15 |
|  |  |  |  | A6NCK2 | TR43B |
|  |  |  |  | O75962-2 | TRIO |
|  |  |  |  | Q9P2H5 | UBP35 |
|  |  |  |  | A6NCI4-2 | VWA3A |

Data analysis from mass spectrometry.

NPs were incubated with Normal Human Serum (NHS) for 1h and analyzed. Mass spectrometry analysis highlighted 48 proteins specific for NP (left column), 74 proteins specific for NP-HSA (right column), and 31 proteins that are present on both NPs (central column).

**Supplementary table 2:**

| NP-HSA | | Shared | | t-NP-HSA | |
| --- | --- | --- | --- | --- | --- |
| Q96P26-2 | 5NT1B | Q8NHS2 | AATC2 | P52209-2 | 6PGD |
| P02763 | A1AG1 | P60709 | ACTB | Q8N0Z2 | ABRA |
| P04217-2 | A1BG | Q9BQI0-2 | AIF1L | P53396-2 | ACLY |
| P01023 | A2MG | P02768 | ALBU | Q08043 | ACTN3 |
| Q8IUA7-3 | ABCA9 | P02647 | APOA1 | P40394 | ADH7 |
| Q9H221-2 | ABCG8 | P02652 | APOA2 | Q7Z7M1 | AGRD2 |
| Q09666 | AHNK | P02655 | APOC2 | Q8N7Z5 | ANR31 |
| Q8NAG6-1 | ANKL1 | P02656 | APOC3 | P02654 | APOC1 |
| Q8TER5-2 | ARH40 | P02649 | APOE | P05090 | APOD |
| Q6ZSZ5-2 | ARHGI | P46100-2 | ATRX | Q8WXK1 | ASB15 |
| Q8N3C0 | ASCC3 | P10909-2 | CLUS | O75185-2 | AT2C2 |
| Q6ZP68 | ATPUN | P01024 | CO3 | Q8TE59 | ATS19 |
| P04003 | C4BPA | P0C0L4-2 | CO4A | P02745 | C1QA |
| P55265-2 | DSRAD | Q7Z2K8-2 | GRIN1 | P02747 | C1QC |
| Q03001 | DYST | P69905 | HBA | P09871 | C1S |
| Q63HQ2-2 | EGFLA | P68871 | HBB | O14523 | C2C2L |
| Q9UBC2-2 | EP15R | P00738-2 | HPT | Q9Y6J0-2 | CABIN |
| Q5W0V3-2 | F16B1 | Q8IZT8 | HS3S5 | Q15878-2 | CAC1E |
| Q8TBR7-1 | FA57A | P01876 | IGHA1 | O43866 | CD5L |
| P07148 | FABPL | P01859 | IGHG2 | B2RD01 | CENP1 |
| P02671 | FIBA | P0DOY2 | IGLC2 | O95813 | CER1 |
| P02675 | FIBB | P52292 | IMA1 | Q9H2X0-5 | CHRD |
| Q9P2B2 | FPRP | Q14624-2 | ITIH4 | Q96SZ6-2 | CK5P1 |
| Q8NA03 | FSIP1 | P13645 | K1C10 | P20908 | CO5A1 |
| Q16695 | H31T | P35527 | K1C9 | P23528 | COF1 |
| Q9Y450-4 | HBS1L | P04264 | K2C1 | P38432 | COIL |
| P02790 | HEMO | P01042-2 | KNG1 | Q9UBF2-2 | COPG2 |
| O15347 | HMGB3 | Q9UBU9-2 | NXF1 | Q9Y600-2 | CSAD |
| P0DOX5 | IGG1 | Q05209-2 | PTN12 | O00622 | CYR61 |
| P0DOX6 | IGM | Q4U2R6 | RM51 | P59665 | DEF1 |
| P40189-3 | IL6RB | P0DJI9 | SAA2 | Q5VTE0 | EF1A3 |
| P19823 | ITIH2 | Q8TF72 | SHRM3 | P13639 | EF2 |
| Q9P260-2 | K1468 | Q99536-2 | VAT1 | Q8NDI1 | EHBP1 |
| P13647 | K2C5 | P31629 | ZEP2 | Q96JJ3-3 | ELMO2 |
| Q4VXA5 | KHDC1 |  |  | Q6ZMW3-2 | EMAL6 |
| Q2M1P5 | KIF7 |  |  | Q9BXW9-1 | FACD2 |
| A6PVL3-2 | KNCN |  |  | Q96CS3 | FAF2 |
| Q8N2S1-4 | LTBP4 |  |  | Q15485 | FCN2 |
| Q9Y6D9 | MD1L1 |  |  | O75636-2 | FCN3 |
| O15440-5 | MRP5 |  |  | P04406 | G3P |
| P16333 | NCK1 |  |  | O14556 | G3PT |
| Q969V3-2 | NCLN |  |  | P32455 | GBP1 |
| Q9BTX1-4 | NDC1 |  |  | Q99684 | GFI1 |
| O95096 | NKX22 |  |  | Q6PRD1 | GP179 |
| Q86VF7-2 | NRAP |  |  | P16402 | H13 |
| Q6ZVC0-2 | NYAP1 |  |  | P16104 | H2AX |
| Q9Y3B8 | ORN |  |  | Q5QNW6-2 | H2B2F |
| Q58A45-2 | PAN3 |  |  | P68431 | H31 |
| P00747 | PLMN |  |  | P62805 | H4 |
| Q01860-2 | PO5F1 |  |  | P61978-2 | HNRPK |
| O75400-2 | PR40A |  |  | P07900-2 | HS90A |
| Q7Z5J4-2 | RAI1 |  |  | P08238 | HS90B |
| Q8NC74 | RB8NL |  |  | P11142-2 | HSP7C |
| Q7Z4M0 | RE114 |  |  | Q92743 | HTRA1 |
| Q9BZE1 | RM37 |  |  | A0A0A0MS14 | HV145 |
| P35542 | SAA4 |  |  | Q13099-2 | IFT88 |
| Q8IYX7 | SAXO1 |  |  | P0DOX2 | IGA2 |
| Q9NQW1-5 | SC31B |  |  | P01857 | IGHG1 |
| Q96FS4 | SIPA1 |  |  | P01860 | IGHG3 |
| Q8WWL2-2 | SPIR2 |  |  | P01871-2 | IGHM |
| Q9UQ35-2 | SRRM2 |  |  | P0DOX7 | IGK |
| Q7RTT3 | SSX9 |  |  | Q5VWK5-7 | IL23R |
| Q9NRC1-2 | ST7 |  |  | Q9NQ38-3 | ISK5 |
| P46977-2 | STT3A |  |  | P35908 | K22E |
| Q9BXT5 | TEX15 |  |  | P19013 | K2C4 |
| A6NCK2 | TR43B |  |  | Q9NXV2 | KCTD5 |
| O75962-2 | TRIO |  |  | Q9H0B6 | KLC2 |
| Q9BZF9-2 | UACA |  |  | P14618-2 | KPYM |
| Q9P2H5 | UBP35 |  |  | A0A0C4DH55 | KVD07 |
| A6NCI4-2 | VWA3A |  |  | P00338-3 | LDHA |
| P49750-3 | YLPM1 |  |  | P07195 | LDHB |
|  |  |  |  | P06858 | LIPL |
|  |  |  |  | Q9NZR2 | LRP1B |
|  |  |  |  | Q9H0U3-2 | MAGT1 |
|  |  |  |  | Q7Z304-2 | MAMC2 |
|  |  |  |  | Q9UHC1-2 | MLH3 |
|  |  |  |  | P20645 | MPRD |
|  |  |  |  | Q685J3-2 | MUC17 |
|  |  |  |  | P35579 | MYH9 |
|  |  |  |  | P15172 | MYOD1 |
|  |  |  |  | Q9BXJ9 | NAA15 |
|  |  |  |  | Q8NA29-3 | NLS1 |
|  |  |  |  | Q6IF00 | OR2T2 |
|  |  |  |  | Q9UBL9-6 | P2RX2 |
|  |  |  |  | Q9UQ80 | PA2G4 |
|  |  |  |  | P29122-2 | PCSK6 |
|  |  |  |  | Q504Y2 | PKDCC |
|  |  |  |  | Q8TCU6-3 | PREX1 |
|  |  |  |  | Q8IYL9 | PSYR |
|  |  |  |  | Q7Z5J4-3 | RAI1 |
|  |  |  |  | P62826 | RAN |
|  |  |  |  | P18621-2 | RL17 |
|  |  |  |  | Q02543 | RL18A |
|  |  |  |  | P35268 | RL22 |
|  |  |  |  | Q9UNX3 | RL26L |
|  |  |  |  | P46779-2 | RL28 |
|  |  |  |  | P62888 | RL30 |
|  |  |  |  | P49207 | RL34 |
|  |  |  |  | P42766 | RL35 |
|  |  |  |  | P18077 | RL35A |
|  |  |  |  | P62424 | RL7A |
|  |  |  |  | Q8NHW5 | RLA0L |
|  |  |  |  | P09651 | ROA1 |
|  |  |  |  | P62277 | RS13 |
|  |  |  |  | P62244 | RS15A |
|  |  |  |  | P62249 | RS16 |
|  |  |  |  | P08708 | RS17 |
|  |  |  |  | P62269 | RS18 |
|  |  |  |  | P15880 | RS2 |
|  |  |  |  | P60866-2 | RS20 |
|  |  |  |  | Q71UM5 | RS27L |
|  |  |  |  | P23396-2 | RS3 |
|  |  |  |  | P61247 | RS3A |
|  |  |  |  | Q8TD47 | RS4Y2 |
|  |  |  |  | P62753 | RS6 |
|  |  |  |  | P62081 | RS7 |
|  |  |  |  | P62241 | RS8 |
|  |  |  |  | P46781 | RS9 |
|  |  |  |  | P08865 | RSSA |
|  |  |  |  | Q92503-2 | S14L1 |
|  |  |  |  | Q6U841 | S4A10 |
|  |  |  |  | P84550-3 | SKOR1 |
|  |  |  |  | Q8N0X7 | SPART |
|  |  |  |  | Q9UM82 | SPAT2 |
|  |  |  |  | Q9BXB7 | SPT16 |
|  |  |  |  | Q07955-3 | SRSF1 |
|  |  |  |  | Q7Z2R9 | SSAS1 |
|  |  |  |  | Q8IX01-3 | SUGP2 |
|  |  |  |  | Q92777-2 | SYN2 |
|  |  |  |  | Q3SY00 | T10IP |
|  |  |  |  | Q9BQE3 | TBA1C |
|  |  |  |  | P07437 | TBB5 |
|  |  |  |  | P17987 | TCPA |
|  |  |  |  | P78371-2 | TCPB |
|  |  |  |  | O43151-4 | TET3 |
|  |  |  |  | O95932-2 | TGM3L |
|  |  |  |  | Q8WZ42-8 | TITIN |
|  |  |  |  | P82094-2 | TMF1 |
|  |  |  |  | P45378-2 | TNNT3 |
|  |  |  |  | Q9NS56-2 | TOPRS |
|  |  |  |  | Q13061 | TRDN |
|  |  |  |  | P04004 | VTNC |
|  |  |  |  | Q9Y3S1-2 | WNK2 |
|  |  |  |  | O14980 | XPO1 |
|  |  |  |  | Q8IZN3-2 | ZDH14 |
|  |  |  |  | Q9H7S9 | ZN703 |
|  |  |  |  | Q32MQ0 | ZN750 |

Data analysis from mass spectrometry.

NPs were incubated with Normal Human Serum (NHS) for 1h and analyzed. Mass spectrometry analysis highlighted 105 proteins specific for NP-HSA (left column), 181 proteins specific for t-NP-HSA (right column), and 34 proteins that are present on both NPs (central column).

**Supplementary Figure 1:
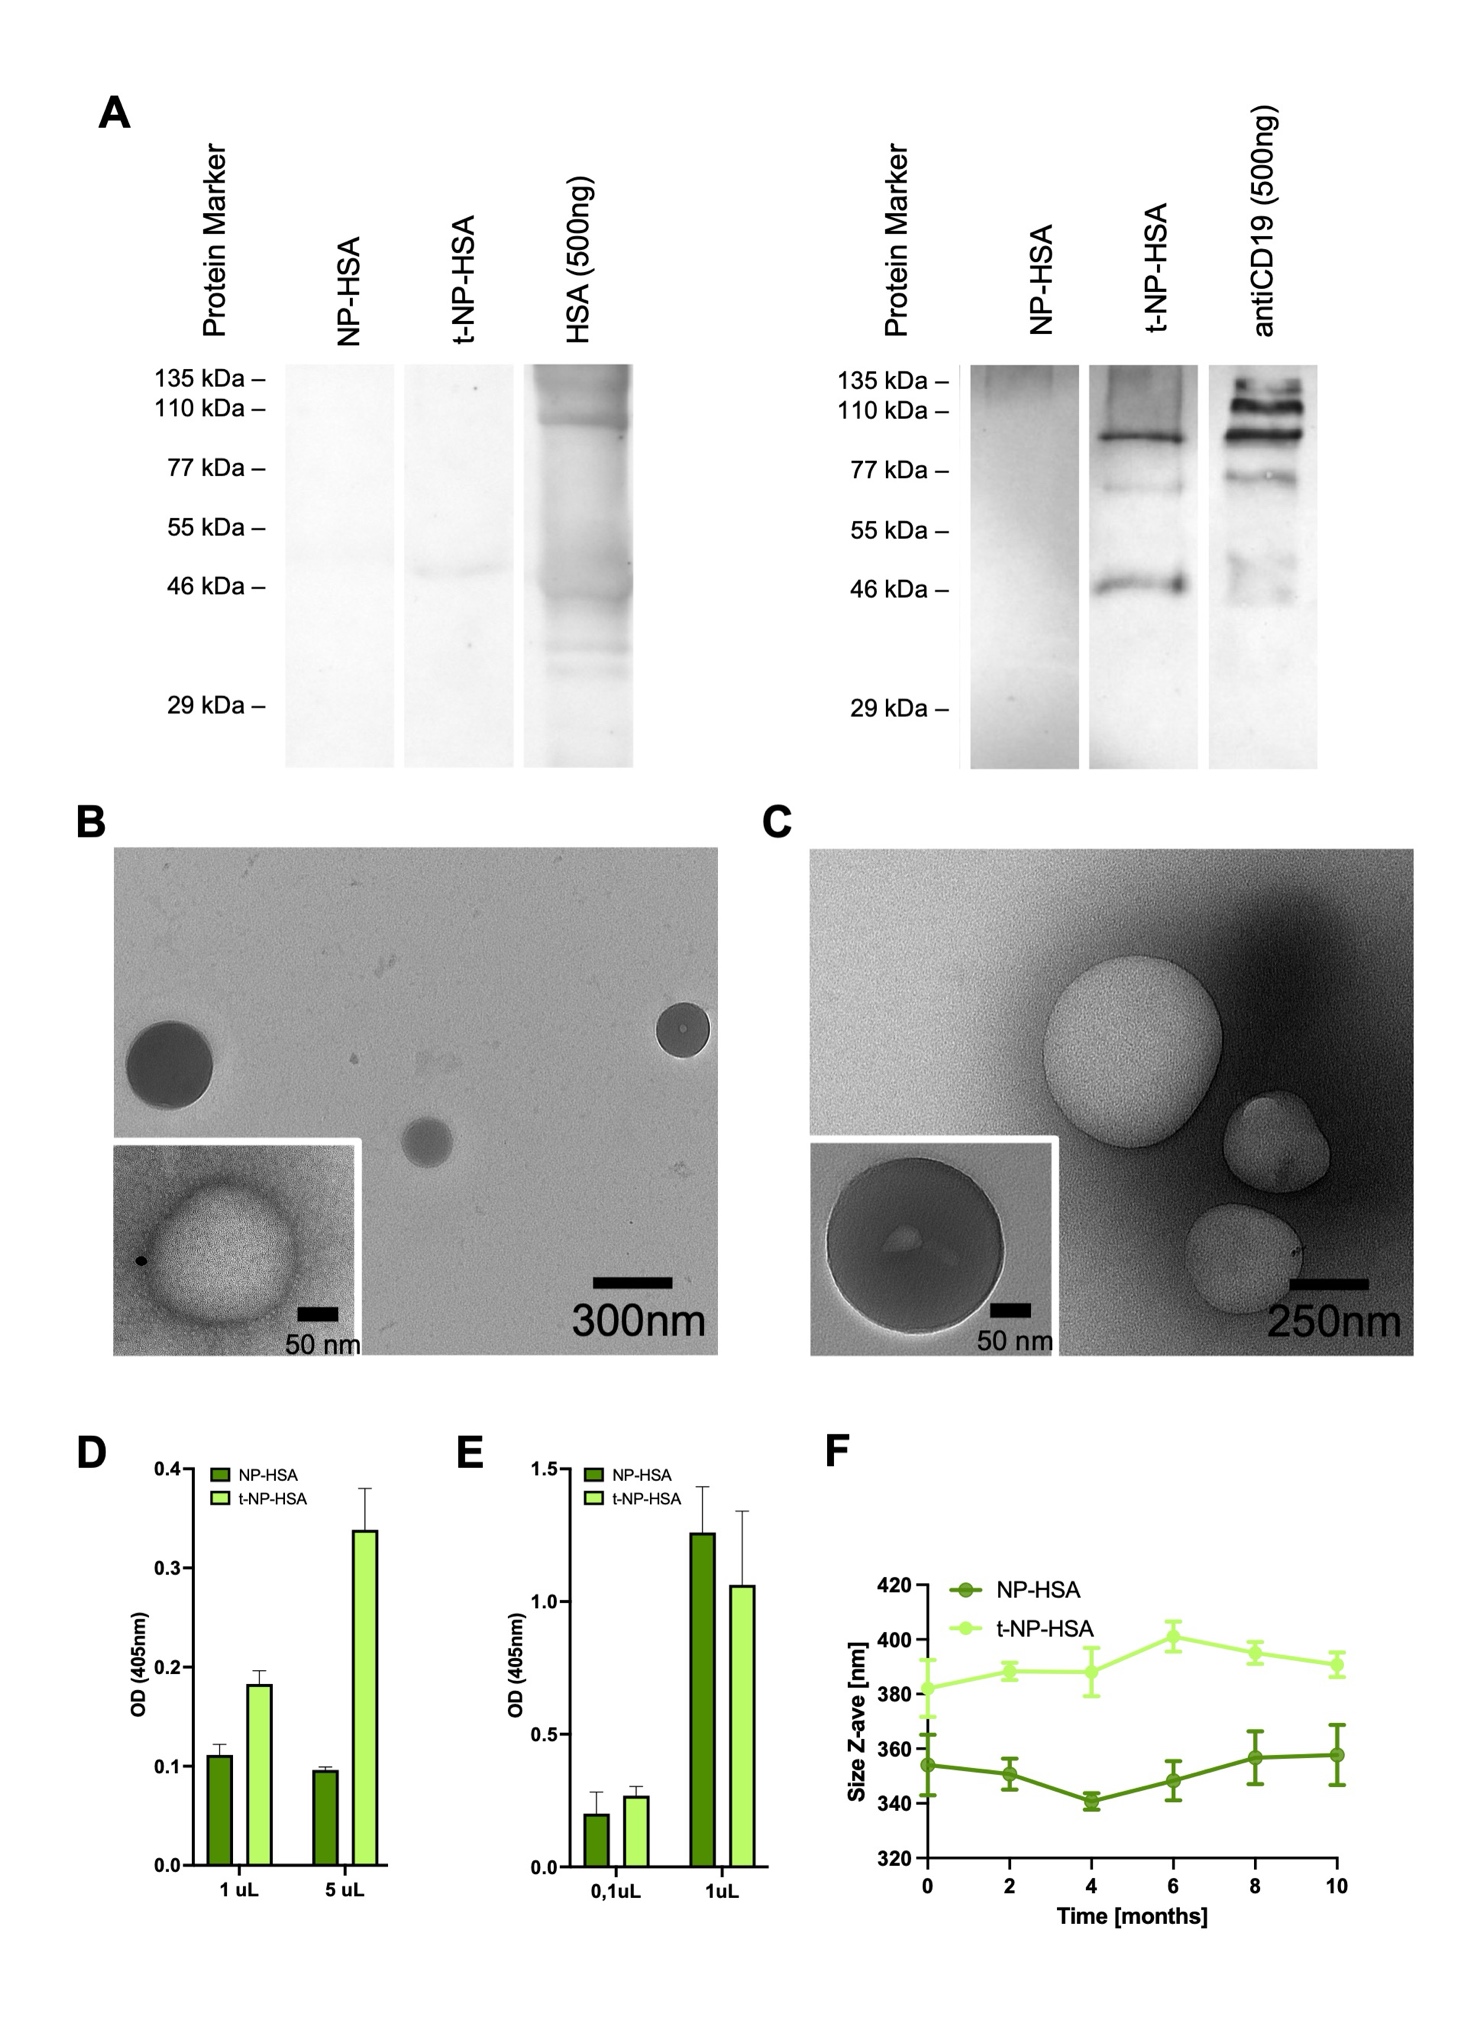
**

Characterization of targeted-nanoparticles.

(A) Western blot analysis conducted in non-reducing conditions of NP-HSA and t-NP-HSA. The left panel shows HSA (500 ng) and NP-HSA, while the right panel compares NP-HSA, t-NP-HSA, and antiCD19 (500 ng) as positive control. The presence of bands at the expected molecular weights confirms the successful conjugation and integrity of the nanoparticles.

(B) Transmission electron microscopy (TEM) image of NP-HSA nanoparticles, showing spherical particles with an approximate diameter of 50 nm (inset). The scale bar represents 300 nm.

(C) TEM image of NP-HSA and t-NP-HSA nanoparticles, showing round-shaped particles, with the inset highlighting the structure of individual particles at 50 nm scale.

(D-E) Results of the comparison between NP-HSA (untargeted-NPs) and t-NP-HSA (targeted-NPs) in ELISA tests. The different values of OD establish the differences in the presence of antiCD19 protein (D) only in t-NP-HSA and HSA coating (E) in both samples. Data have been reported as the mean ± SD. (F) Stability analysis of NP-HSA and t-NP-HSA particles over 10 months, showing a slight variation in size distribution with time, measured by dynamic light scattering (DLS). Data have been reported as the mean ± SD.

**Supplementary Figure 2:
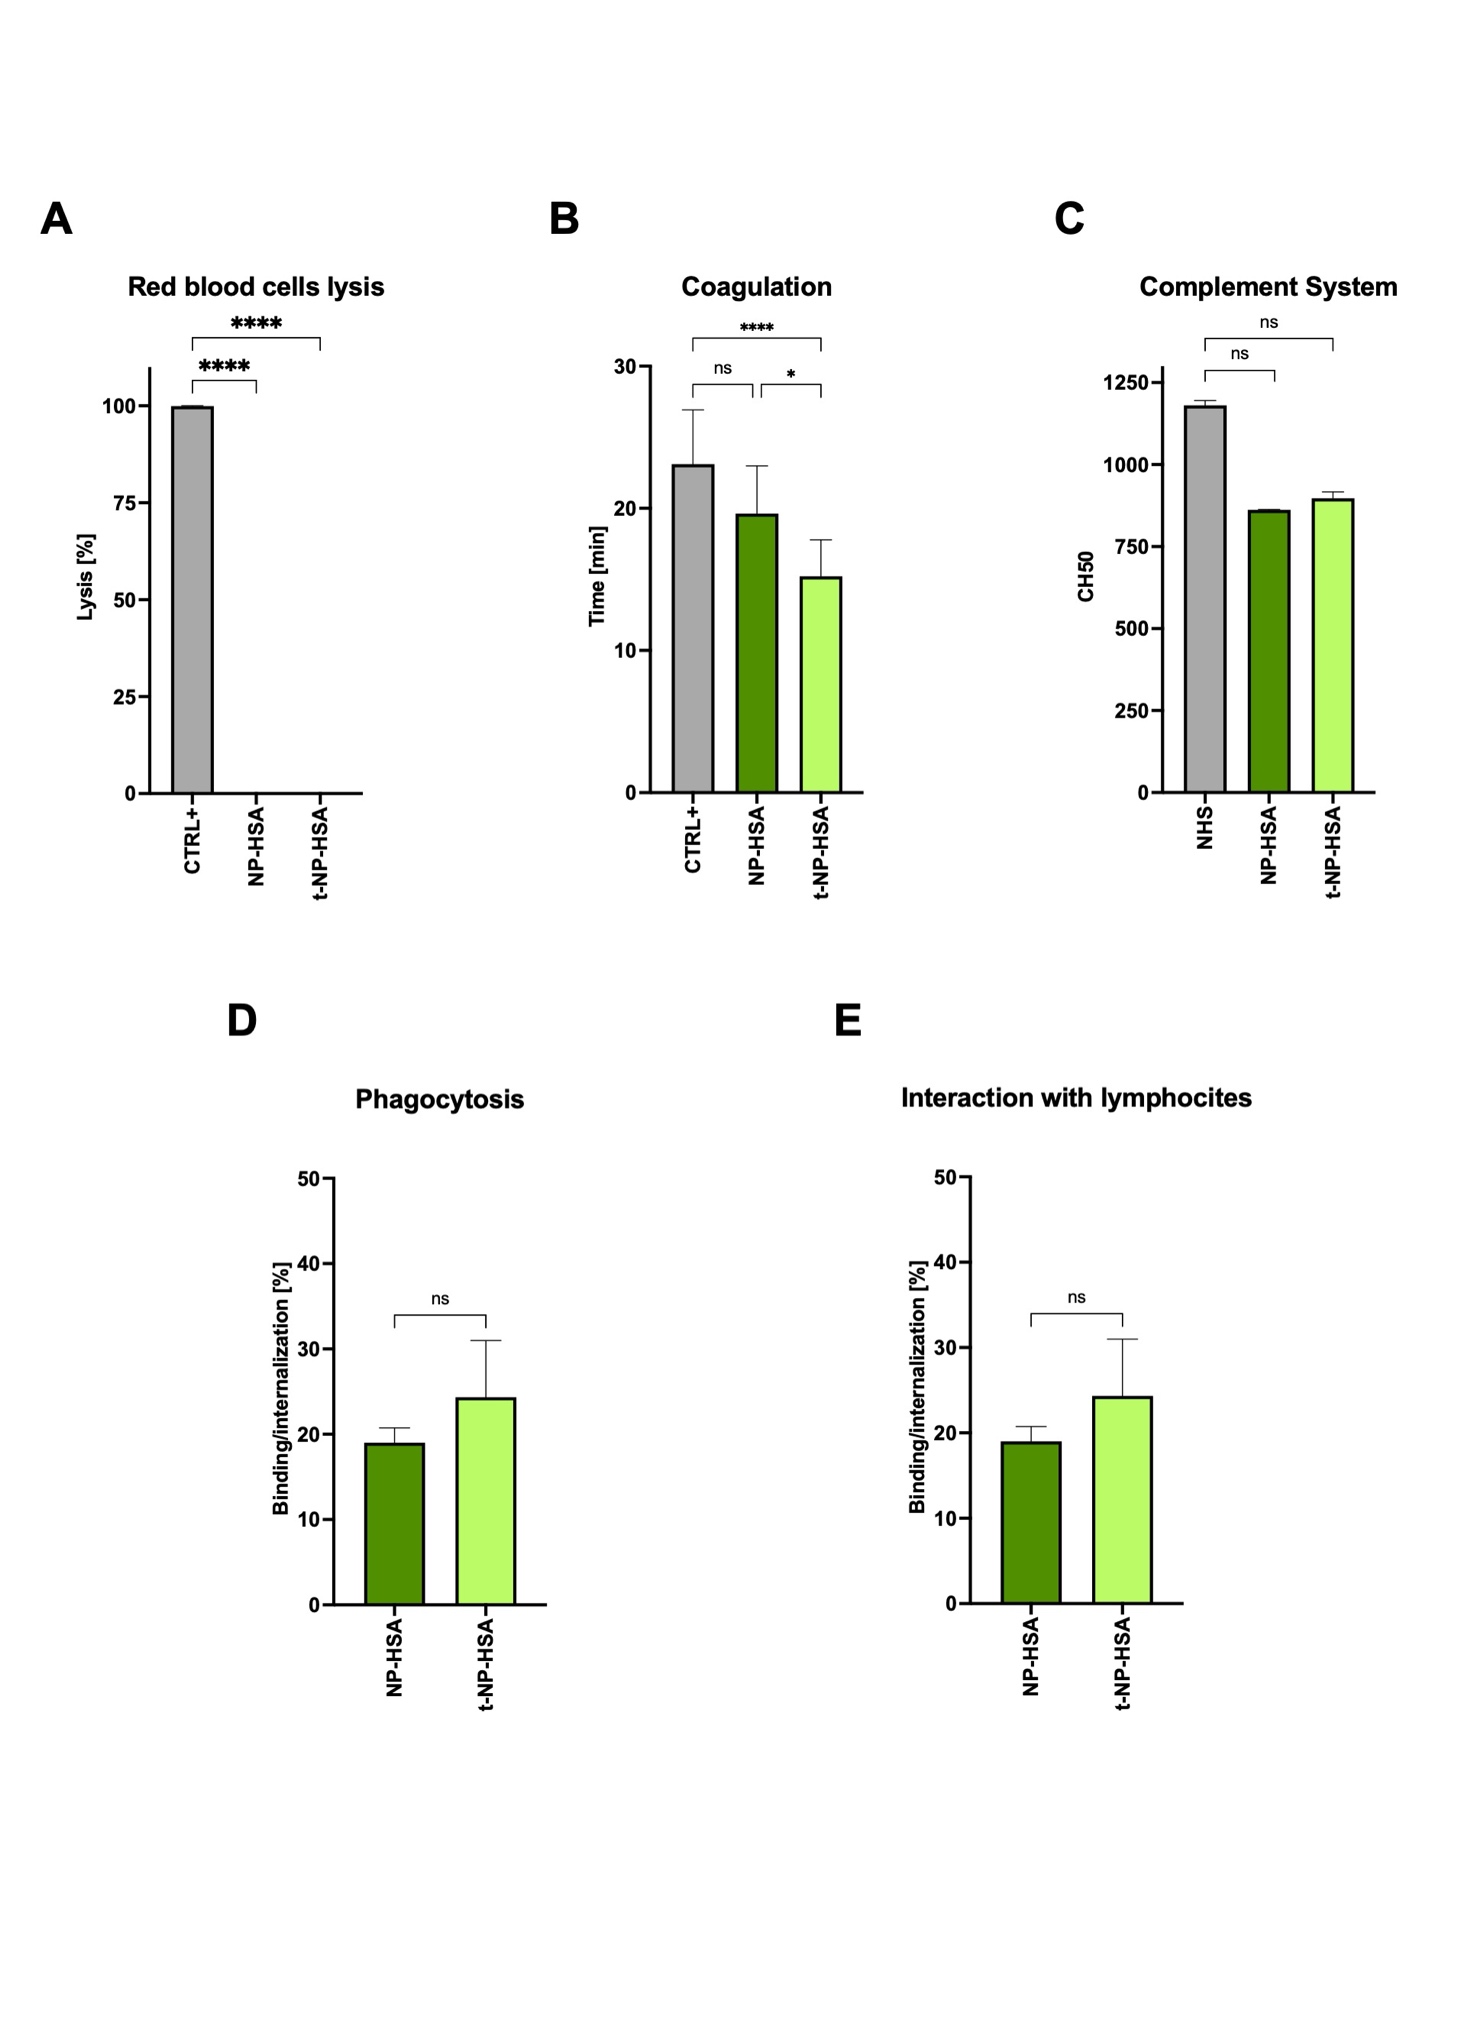
**

In vitro test for nanoparticle functionality.

(A) In vitro analysis of the direct lysis of the red blood cells. The in vitro turbidity curve trend of NP-HSA and t-NP-HSA in activated plasma during the time was employed to extrapolate (B) the fifty percent coagulation time. Data are shown as potential NPs' effect on the coagulation system. (C) CH50 hemolytic activity was evaluated in NHS, as a control, and in the same NHS after 2 hours of incubation with NP-HSA or t-NP-HSA. White cells were isolated from an healthy donor; 100,000 cells (monocytes or lymphocytes) were incubated in the presence of NHS with 4μL of coated NPs (NP-HSA) and targeted-NPs (t-NP-HSA) at 37° for 1 hour and analyzed by flow cytometry to evaluate the percentage of (D) phagocytosis or (E) the interaction of nanosystems with lymphocytes. The targeting mechanism on the surface of nanosystems does not alter the interaction with these cells. Data are reported as the mean ± SD. Statistical analysis: *t-test.* P ≤ 0.1 = *; P ≤ 0.0001 = ****. P≥0.05=ns.
